# Supplementary material for: Cross-Kingdom RNAi of Pathogen Effectors Leads to Quantitative Adult Plant Resistance in Wheat
Source: PubMed Central journal article supplement (PMC7076181; doi:10.3389/fpls.2020.00253), 2020-03-10
Supplement: Data_Sheet_1.pdf [file Data_Sheet_1.pdf]

Supplementary File 1

>Beta2-tub-RNAi repeat sequence

GCGAAGAGAAGCAGAGGGATGTGACTGTCTTCAGGGGTTTCAAATAA  
CACATTCTCTTGGGGGTGGTACAGGTGCCGGTATGGGTACGTTATTAA  
TTCAAAAATCCGGGAAGAATCCCTGATCGAATGATGGCA
