# Supplementary material for: Cross-Kingdom RNAi of Pathogen Effectors Leads to Quantitative Adult Plant Resistance in Wheat
Source: PubMed Central journal article supplement (PMC7076181; doi:10.3389/fpls.2020.00253), 2020-03-10
Supplement: Data_Sheet_2.pdf [file Data_Sheet_2.pdf]

Supplementary File 2

>target sequence

ATTCAAATAAGCTACTTGCTCATC

>putative protein

MSPVNADHRAGDPEVRPAFGRCVLSLNSGMVALDDQFVGKVLMTIN  
GDRPPVLPDNLKALGIAHQISYLLIKVCPAPADFFVRFRTTFGCSRVF  
ESSRRLFCDGALVSFHRWHPGWGSPSELEFLTKLTSTTSLGVLGTTSP\*
